# Supplementary material for: Preclinical Assessment of the Combination of PSMA-Targeting Radionuclide Therapy with PARP Inhibitors for Prostate Cancer Treatment
Source: MDPI journal article supplement (doi:10.3390/ijms23148037), 2022-07-21
Supplement: s1 [file s1]

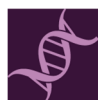

Article

# Preclinical Assessment of the Combination of PSMA-Targeting Radionuclide Therapy with PARP Inhibitors for Prostate Cancer Treatment

Eline A. M. Ruigrok <sup>1,2</sup>, Nicole S. Verkaik <sup>3</sup>, Erik de Blois <sup>1</sup>, Corrina de Ridder <sup>1,2</sup>, Debra Stuurman <sup>1,2</sup>, Stefan J. Roobol <sup>1,3</sup>, Dik C. Van Gent <sup>3</sup>, Marion de Jong <sup>1,†</sup>, Wytse M. Van Weerden <sup>2</sup> and Julie Nonnekens <sup>1,3,\*</sup>

## Supplemental figures

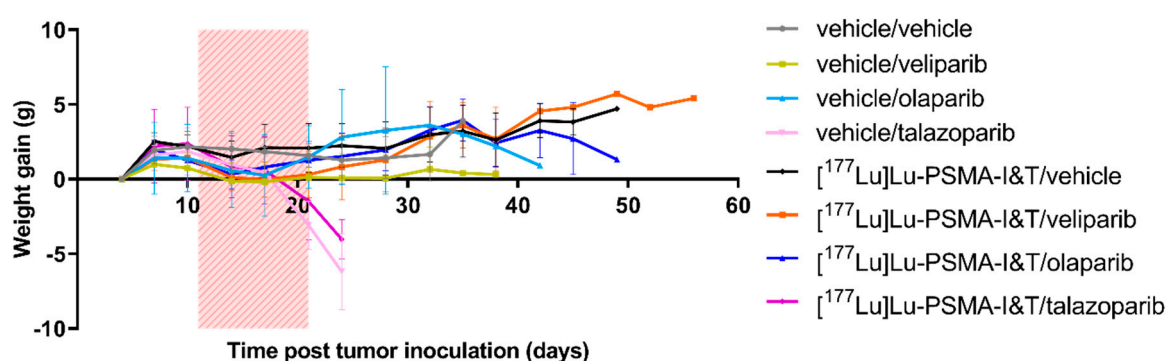

Figure S1. Weight gain over time of mice from the *in vivo* study (see Figure 3).

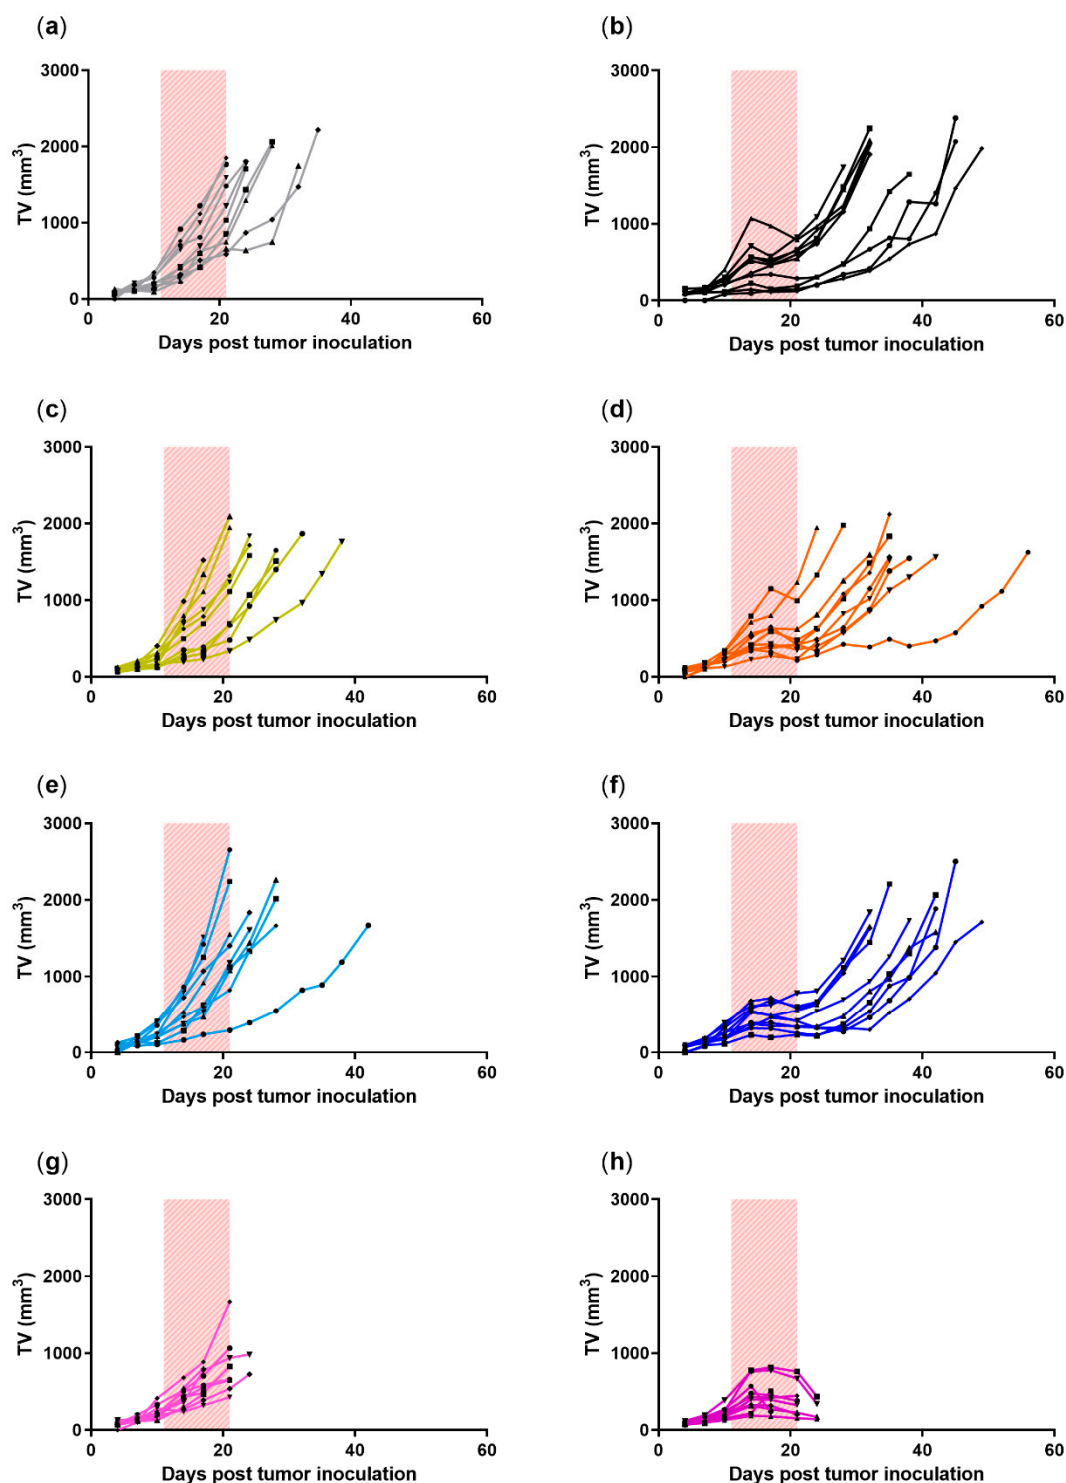

**Figure S2.** Tumor growth of individual mice in separate graphs per group. (a) Group1 vehicle/vehicle, (b) group 2 [ $^{177}\text{Lu}$ ]Lu-PSMA-I&T/vehicle, (c) group 3 vehicle/veliparib, (d) group 4 [ $^{177}\text{Lu}$ ]Lu-PSMA-I&T/veliparib, (e) vehicle/olaparib, (f) [ $^{177}\text{Lu}$ ]Lu-PSMA-I&T/olaparib, (g) vehicle/talazoparib and (h) group 8 [ $^{177}\text{Lu}$ ]Lu-PSMA-I&T/talazoparib. The red box indicates the treatment period with one injection of [ $^{177}\text{Lu}$ ]Lu-PSMA-I&T or vehicle at day 11 and subsequent daily dosing by oral gavage of the PARPi or vehicle from day 11 until day 21.
